# Supplementary material for: Oxide-based bionic hetero-dendritic neuron with capabilities of Bienenstock–Cooper–Munro learning activities
Source: Royal Society of Chemistry journal article supplement (doi:10.1039/d4tc04421e), 2024-11-18
Supplement: d4tc04421e1.pdf [file d4tc04421e1.pdf]

## Supporting Information

### **Oxide-Based Bionic Hetero-Dendritic Neuron with Capabilities of Bienenstock-Cooper-Munro Learning Activities**

Jia Kang Di <sup>a</sup>, You Jie Huang <sup>a</sup>, Wei Sheng Wang <sup>a, b</sup>, Xin Huang <sup>a</sup>, Hui Xiao <sup>b</sup> and  
Li Qiang Zhu <sup>a, \*</sup>

<sup>a</sup> School of Physical Science and Technology, Ningbo University, Ningbo 315211,  
Zhejiang, P.R.China

<sup>b</sup> Ningbo Institute of Material Technology and Engineering, Chinese Academy of  
Sciences, Ningbo, 315201, P.R.China

**Table S1.** Comparison of proton conductivity ( $\sigma$ ) and relaxation times of different electrolyte.

| $\sigma$ (S/cm)      | $\tau_1$ (ms) | $\tau_2$ (ms) | Ref.       |
|----------------------|---------------|---------------|------------|
| $1 \times 10^{-4}$   | 23            | 261           | [1]        |
| $1.6 \times 10^{-3}$ | 18            | 312           | [2]        |
| $1.8 \times 10^{-4}$ | 48            | 425           | [3]        |
| $6 \times 10^{-5}$   | 170           | 3930          | This work. |

**Table S2.** Comparison of power consumptions of reported neuromorphic transistors.

| Substrate           | Channel                    | Electrolyte             | Spike condition                    | P       | Ref.      |
|---------------------|----------------------------|-------------------------|------------------------------------|---------|-----------|
| Paper               | IZO                        | Chitosan                | Vgs (0.5 V, 10 ms)<br>Vds 0.6 V    | 26 pJ   | [4]       |
| Glass               | DPP-SVS                    | Ion-gel                 | Vgs (-0.2 V, 20 ms)<br>Vds -0.05 V | 19.2 pJ | [5]       |
| SiO <sub>2</sub>    | CNT                        | PEG                     | Vgs (5 V, 1 ms)<br>Vds 0.5 V       | 7.5 pJ  | [6]       |
| Glass               | IZO                        | KH550-GO                | Vgs (-0.8 V, 10ms)<br>Vds 0.2 V    | 3.7 pJ  | [7]       |
| Si/SiO <sub>2</sub> | $\alpha$ -MoO <sub>3</sub> | LiClO <sub>4</sub> /PEO | Vgs (2.5 V, 1 ms)<br>Vds -         | 0.16 pJ | [8]       |
| Glass               | ITO                        | Pectin/Chitosan         | -                                  | 7.8 fJ  | [2]       |
| PET                 | GDY/MoS <sub>2</sub>       | LiClO <sub>4</sub>      | -                                  | 5 fJ    | [9]       |
| Glass               | ITO                        | PVA                     | Vgs (10 mV, -)<br>Vds 1 mV         | 1.16 fJ | [10]      |
| PDMS                | IGZO                       | Ion-gel                 | Vgs (20 mV, 10 ms)<br>Vds 0.1 mV   | 0.36 fJ | [11]      |
| Glass               | ITO                        | SA/GO                   | Vgs (0.1 V, 300 ms)<br>Vds 0.01 mV | 93.3 aJ | This work |

[1] Y.J.Huang, J.K.Di, Y.Li, X.Huang, W.S.Wang, X.L.Chen, H.Xiao, L.Q.Zhu, Polyvinyl alcohol electrolyte gated oxide transistors with tetanization activities for neuromorphic computing, *Journal of Materials Chemistry C*, 2024, 12(14): 5166-5174.

[2] Y. Li, Y. J. Huang, X. L. Chen, W. S. Wang, X. Huang, H. Xiao, L. Q. Zhu, Multi-terminal pectin/chitosan hybrid electrolyte gated oxide neuromorphic transistor with multi-mode cognitive activities, *Frontiers of Physics*, 2024, 19(5), 53204, doi: 10.1007/s11467-024-1401-z.

[3] Z.W.Shi, W.S.Wang, L.Ai, Y.Li, X.L.Chen, H.Xiao, Y.H.Zeng, L.Q. Zhu, Non-associative learning behavior in mixed proton and electron conductor hybrid pseudo-diode, *Journal of Materials Science & Technology*, 160, 2023, 204-213, <https://doi.org/10.1016/j.jmst.2023.02.061>

- [4] G. D. Wu, J. Zhang, X. Wan, Y. Yang, S. H. Jiang, Chitosan-based biopolysaccharide proton conductors for synaptic transistors on paper substrates, *Journal of Materials Chemistry C*, 2014, 2(31), 6249-6255, doi: 10.1039/c4tc00652f.
- [5] N. Kim, G. T. Go, H. L. Park, Y. Ahn, J. Kim, Y. Lee, D. G. Seo, W. Lee, Y. H. Kim, H. Yang, T. W. Lee, Molecular Tailoring to Achieve Long-Term Plasticity in Organic Synaptic Transistors for Neuromorphic Computing, *Advanced Intelligent Systems*, 2023, 5(9), 2300016, doi: 10.1002/aisy.202300016.
- [6] K. Kim, C. L. Chen, Q. Truong, A. M. Shen, Y. Chen, A Carbon Nanotube Synapse with Dynamic Logic and Learning, *Advanced Materials*, 2013, 25(12), 1693-1698, doi: 10.1002/adma.201203116.
- [7] Y. Yang, J. Wen, L. Q. Guo, X. Wan, P. F. Du, P. Feng, Y. Shi, Q. Wan, Long-Term Synaptic Plasticity Emulated in Modified Graphene Oxide Electrolyte Gated IZO-Based Thin-Film Transistors, *ACS Applied Materials & Interfaces*, 2016, 8(44), 30281-30286, doi: 10.1021/acsami.6b08515.
- [8] C. S. Yang, D. S. Shang, N. Liu, E. J. Fuller, S. Agrawal, A. A. Talin, Y. Q. Li, B. G. Shen, Y. Sun, All-Solid-State Synaptic Transistor with Ultralow Conductance for Neuromorphic Computing, *Advanced Functional Materials*, 2018, 28(42), 1804170, doi: 10.1002/adfm.201804170.
- [9] B. W. Yao, J. Q. Li, X. D. Chen, M. X. Yu, Z. C. Zhang, Y. Li, T. B. Lu, J. Zhang, Non-Volatile Electrolyte-Gated Transistors Based on Graphdiyne/MoS<sub>2</sub> with Robust Stability for Low-Power Neuromorphic Computing and Logic-In-Memory, *Advanced Functional Materials*, 2021, 31(25), 2100069, doi: 10.1002/adfm.202100069.
- [10] L. Q. Guo, H. Han, L. Q. Zhu, Y. B. Guo, F. Yu, Z. Y. Ren, H. Xiao, Z. Y. Ge, J. N. Ding, Oxide Neuromorphic Transistors Gated by Polyvinyl Alcohol Solid Electrolytes with Ultralow Power Consumption, *ACS Applied Materials & Interfaces*, 2019, 11(31), 28352-28358, doi: 10.1021/acsami.9b05717.
- [11] B. Huang, C. H. Deng, L. F. Lan, Y. P. Li, B. Z. Chen, J. T. Xu, J. Y. Pan, K. X. Shen, J. L. Huang, Q. Wan, J. B. Peng, Y. Cao, Skin-like n-type stretchable synaptic transistors with low energy consumption and highly reliable plasticity for brain-inspired computing, *Nano Energy*, 2024, 128, 109891, doi: 10.1016/j.nanoen.2024.109891.
